# Supplementary material for: Central-to-Helical-to-Axial Chirality Transfer in Chiroptical Sensing with Ferrocene Chromophore
Source: MDPI journal article supplement (doi:10.3390/inorganics11060225), 2023-05-24
Supplement: s1 [file s1]

Archive with 1 entries (1 files):
- inorganics-2415331-supplementary.pdf
